# Supplementary material
Source: publisher figshare collection journal article supplement (https://acs.figshare.com/ndownloader/files/3813526)
Supplement: Supplementary file 1 [file 3813526]

**Electronic Supporting Information:**

**Wormlike Micelles with Photoresponsive Viscoelastic  
Behavior Formed by Surface Active Ionic Liquid/Azobenzene  
Derivative Mixed Solution**

Yanhui Bi,<sup>a</sup> Hongtu Wei,<sup>b</sup> Qiongzhen Hu,<sup>c</sup> Wenwen Xu,<sup>a</sup> Yanjun Gong,<sup>a</sup> Li Yu<sup>a\*</sup>

<sup>a</sup> *Key Laboratory of Colloid and Interface Chemistry, Shandong University, Ministry of Education, Jinan 250100,  
PR China.*

<sup>b</sup> *China Research Institute of Daily Chemical Industry, Taiyuan 030001, PR China*

<sup>c</sup> *Department of Chemistry, University of Houston, Houston, Texas 77204, United States.*

## <sup>1</sup>H NMR spectroscopy for C<sub>16</sub>mimBr

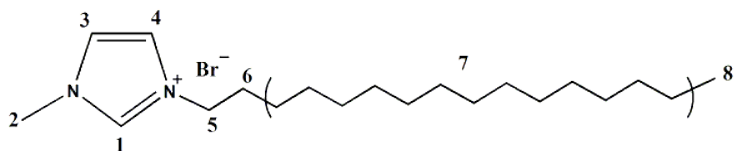

For C<sub>16</sub>mimBr, <sup>1</sup>H NMR (CDCl<sub>3</sub>, δ/ppm): 0.88 (t, 3H, H<sub>8</sub>), 1.25-1.33 (d, 26H, H<sub>7</sub>), 1.92 (t, 2H, H<sub>6</sub>), 4.13 (s, 3H, H<sub>2</sub>), 4.31 (t, 2H, H<sub>5</sub>), 7.21 (d, 2H, H<sub>3</sub> and H<sub>4</sub>), 10.95 (s, 1H, H<sub>1</sub>).

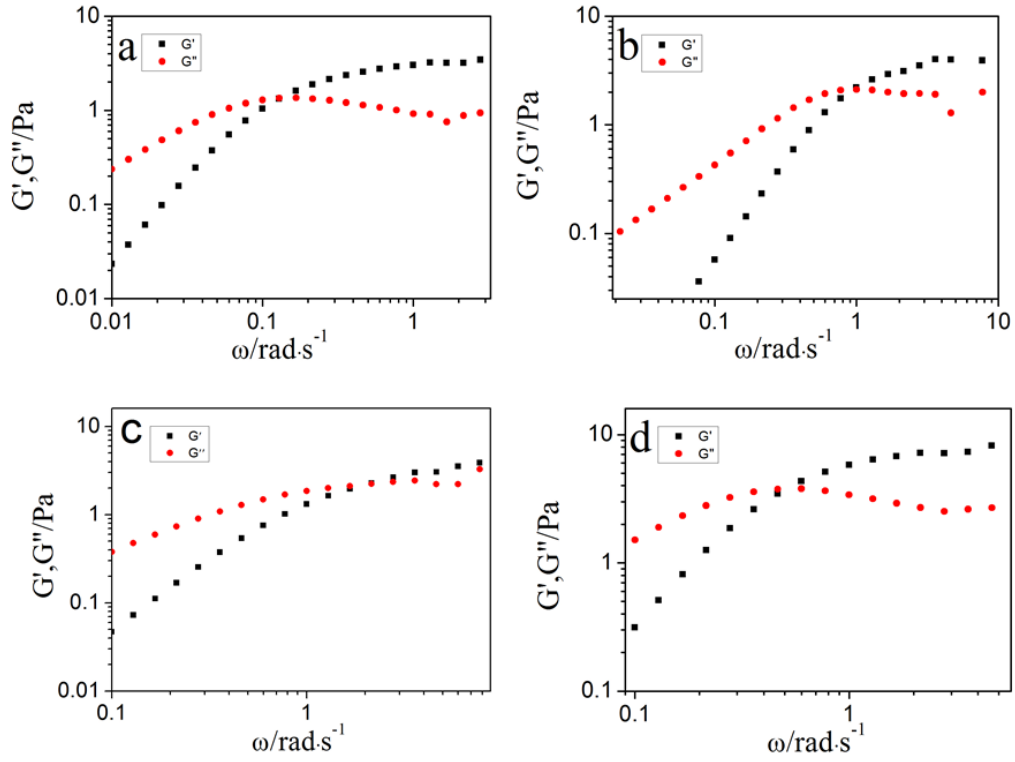

Fig. S1 Dynamic frequency spectra exhibiting elastic ( $G'$ ) and viscous ( $G''$ ) modulus as a function of oscillatory shear frequency  $\omega$ .  $C_{16}mimBr/AzoCOONa$  (2:1 molar ratio) aqueous solution with different concentrations (mM): 40/20 (a), 50/25 (b), 60/30 (c), 80/40 (d), respectively.

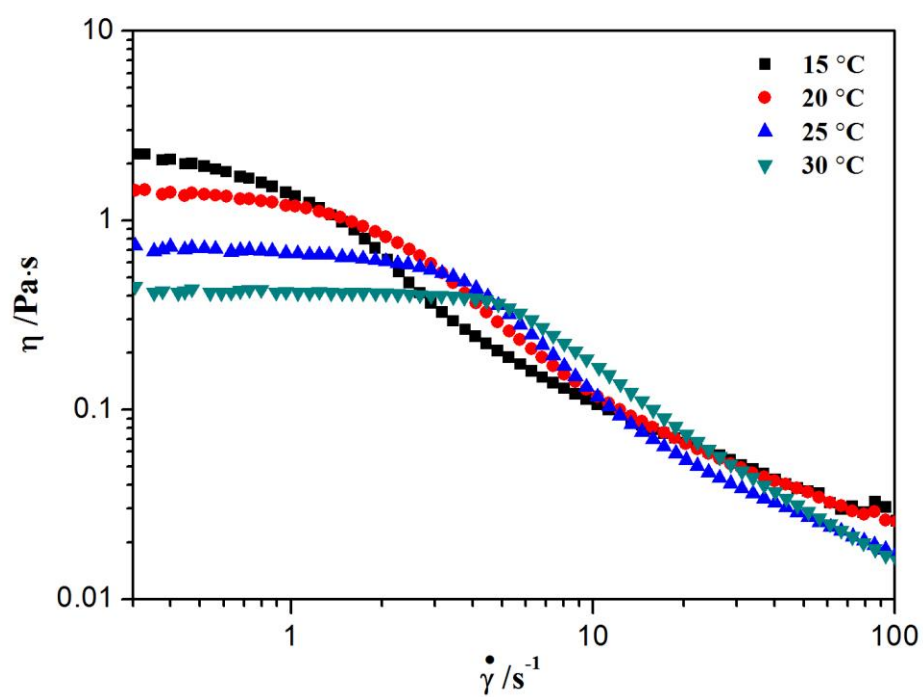

Fig. S2 Steady-shear rheology showing shear viscosity  $\eta$  as a function of shear rate  $\dot{\gamma}$  at different temperature.

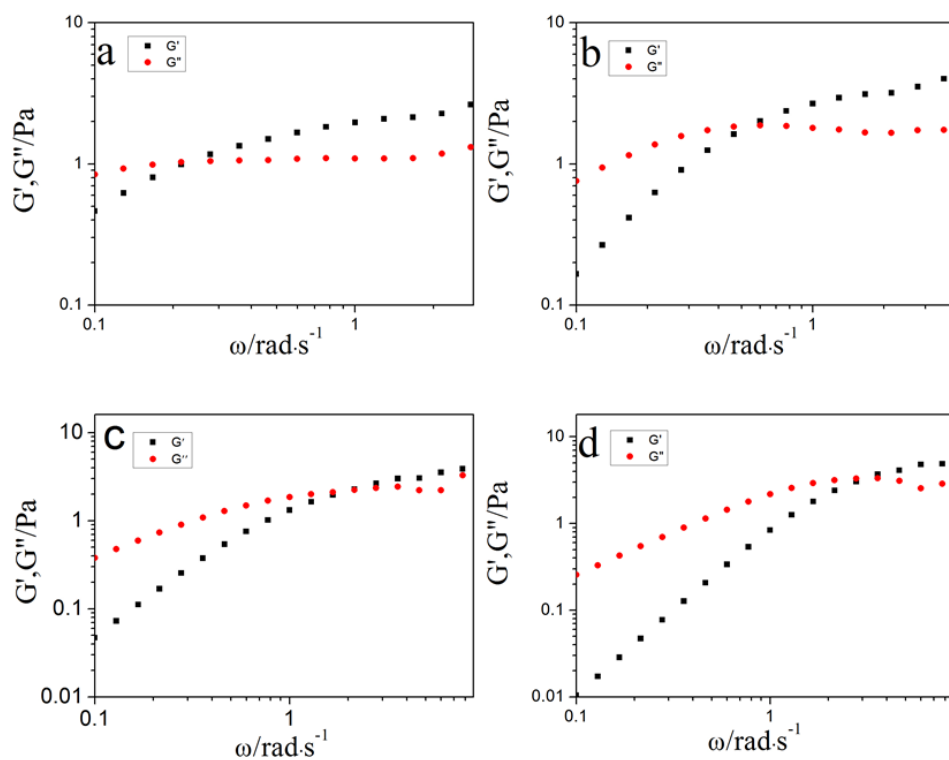

Fig.S3 Dynamic frequency sweep of the aqueous solution containing  $\text{C}_{16}\text{mimBr}$  (60 mM) and  $\text{AzoCOONa}$  (30 mM) at different temperature:  $15^\circ\text{C}$  (a),  $20^\circ\text{C}$  (b),  $25^\circ\text{C}$  (c), and  $30^\circ\text{C}$  (d), respectively.
